# Supplementary material
Source: PubMed Central journal article supplement (PMC4733404)

**A.**BDBV41: GP $\Delta$ muc-Relion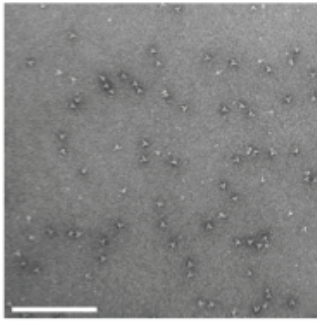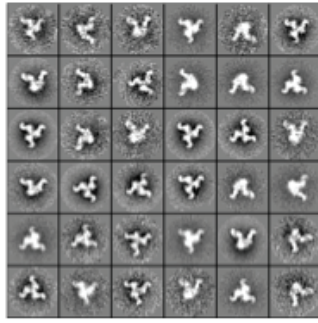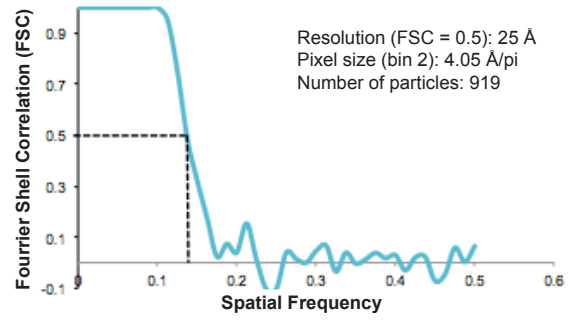**B.**BDBV335: GP $\Delta$ muc-EMAN2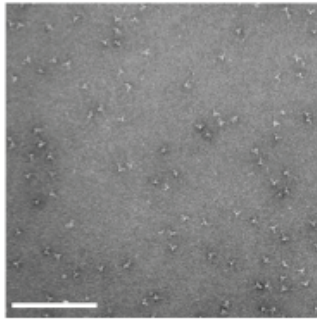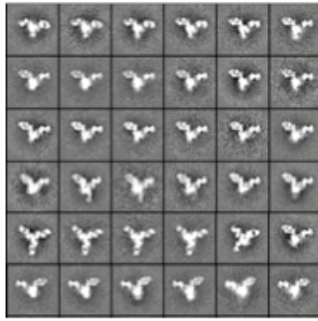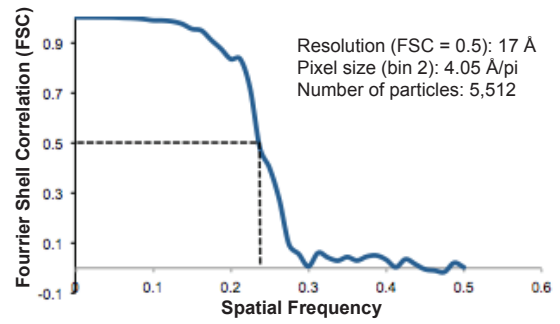**C.**BDBV432: GP $\Delta$ muc-EMAN2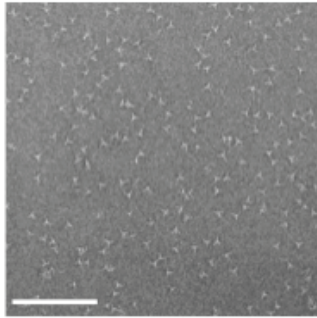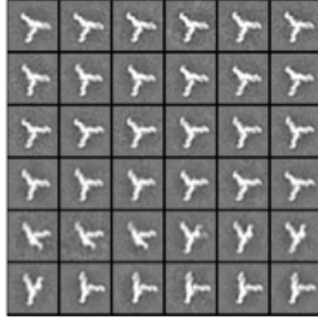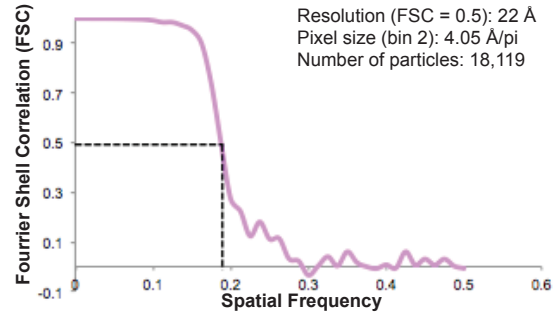**D.**

BDBV353: GP-Relion

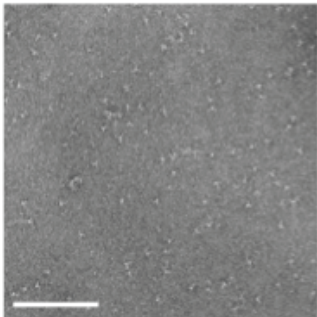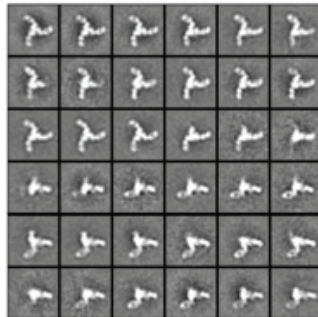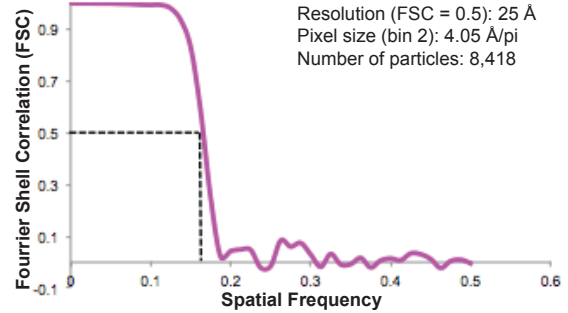**E.**

BDBV289: GP-EMAN2

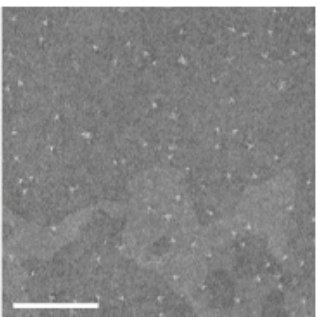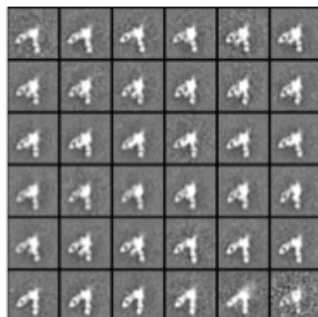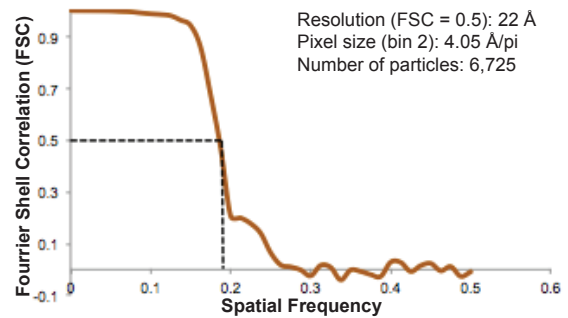

Supplement: NIHMS746048-supplement-3.pdf [file NIHMS746048-supplement-3.pdf]
