# Supplementary material
Source: PubMed Central journal article supplement (PMC4733404)
Supplement: NIHMS746048-supplement-4.pdf [file NIHMS746048-supplement-4.pdf]

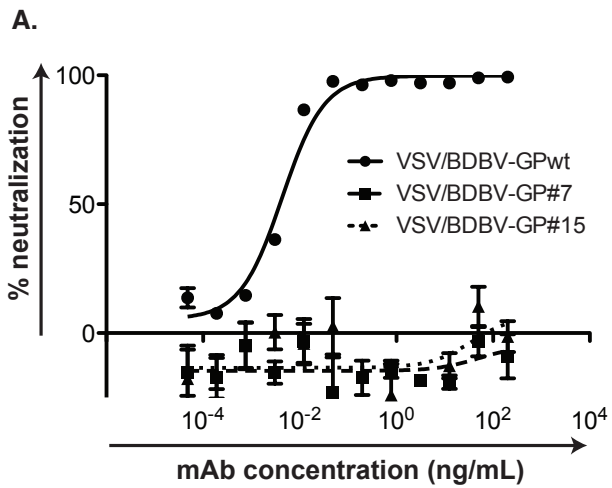

**B.**

| BDBV41 escape mutants | AA changes compared to wt | Location          |
|-----------------------|---------------------------|-------------------|
| VSV/BDBV-GP#7         | 271Gly → Arg              | Glycan cap        |
|                       | 272Thr → Ser              |                   |
|                       | 445His → Arg              | Mucin-like domain |
| VSV/BDBV-GP#15        | 271Gly → Arg              | Glycan cap        |
|                       | 272Thr → Ser              |                   |
