# Supplementary material
Source: PubMed Central journal article supplement (PMC4733404)

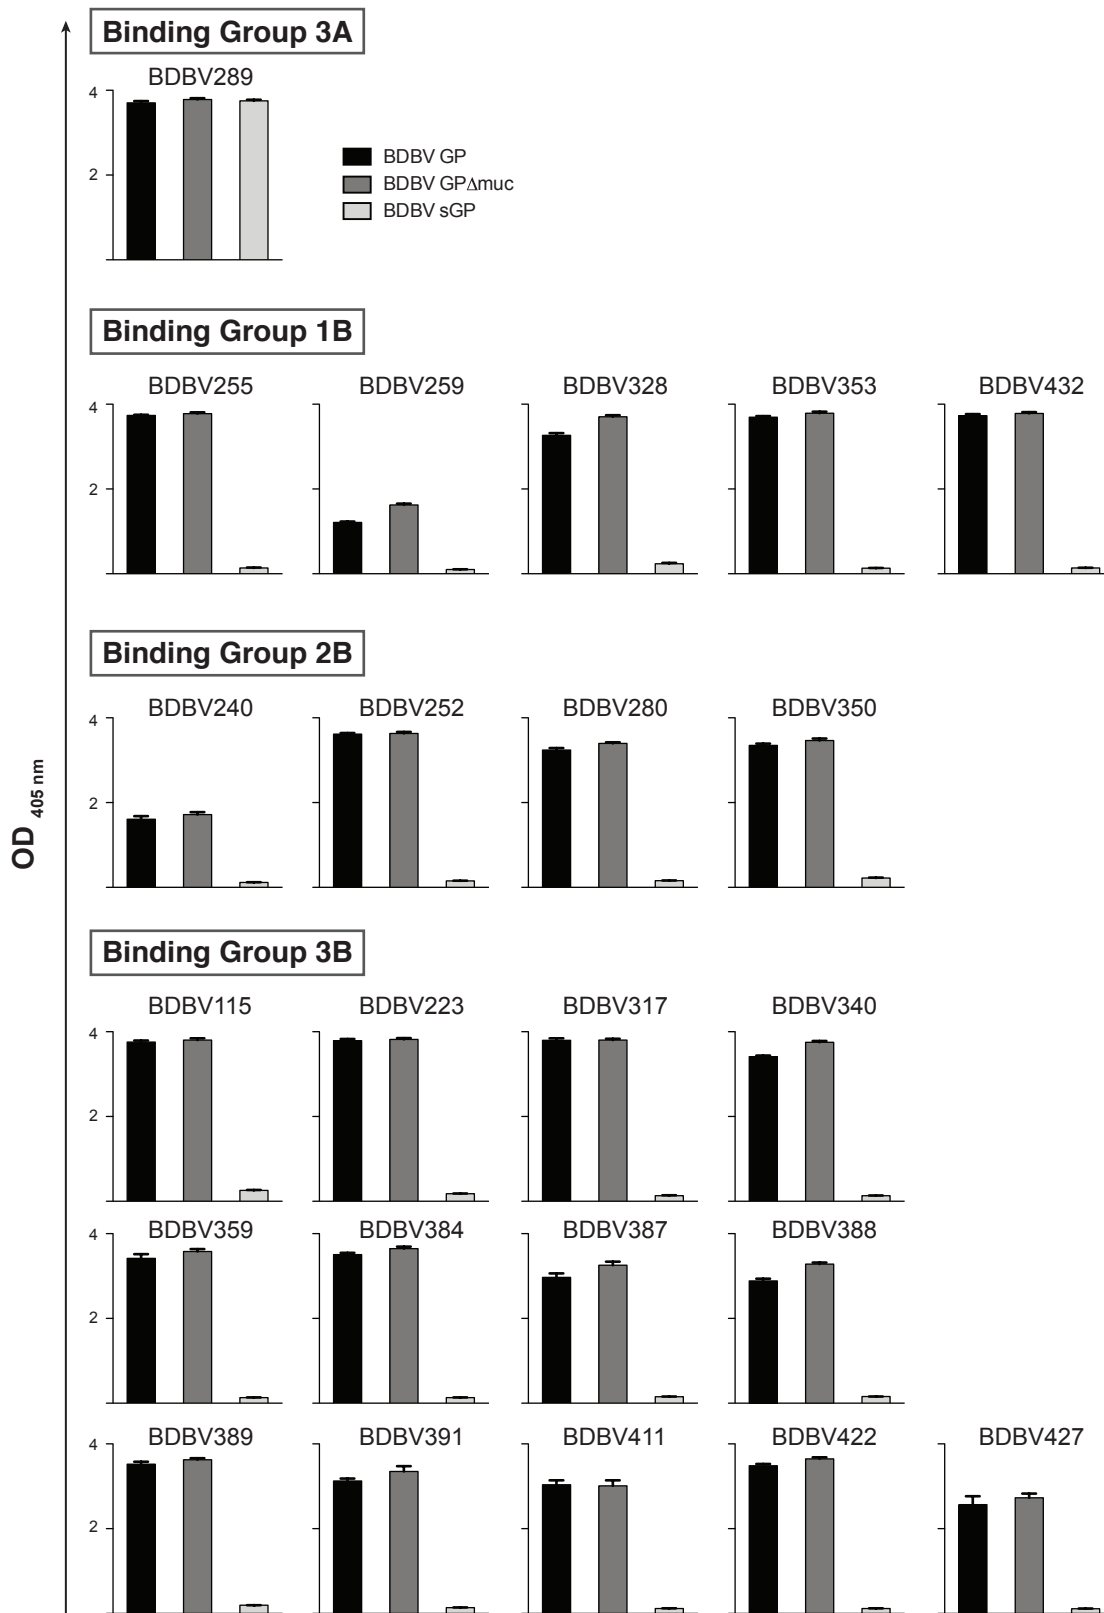

Supplement: NIHMS746048-supplement-1.pdf [file NIHMS746048-supplement-1.pdf]

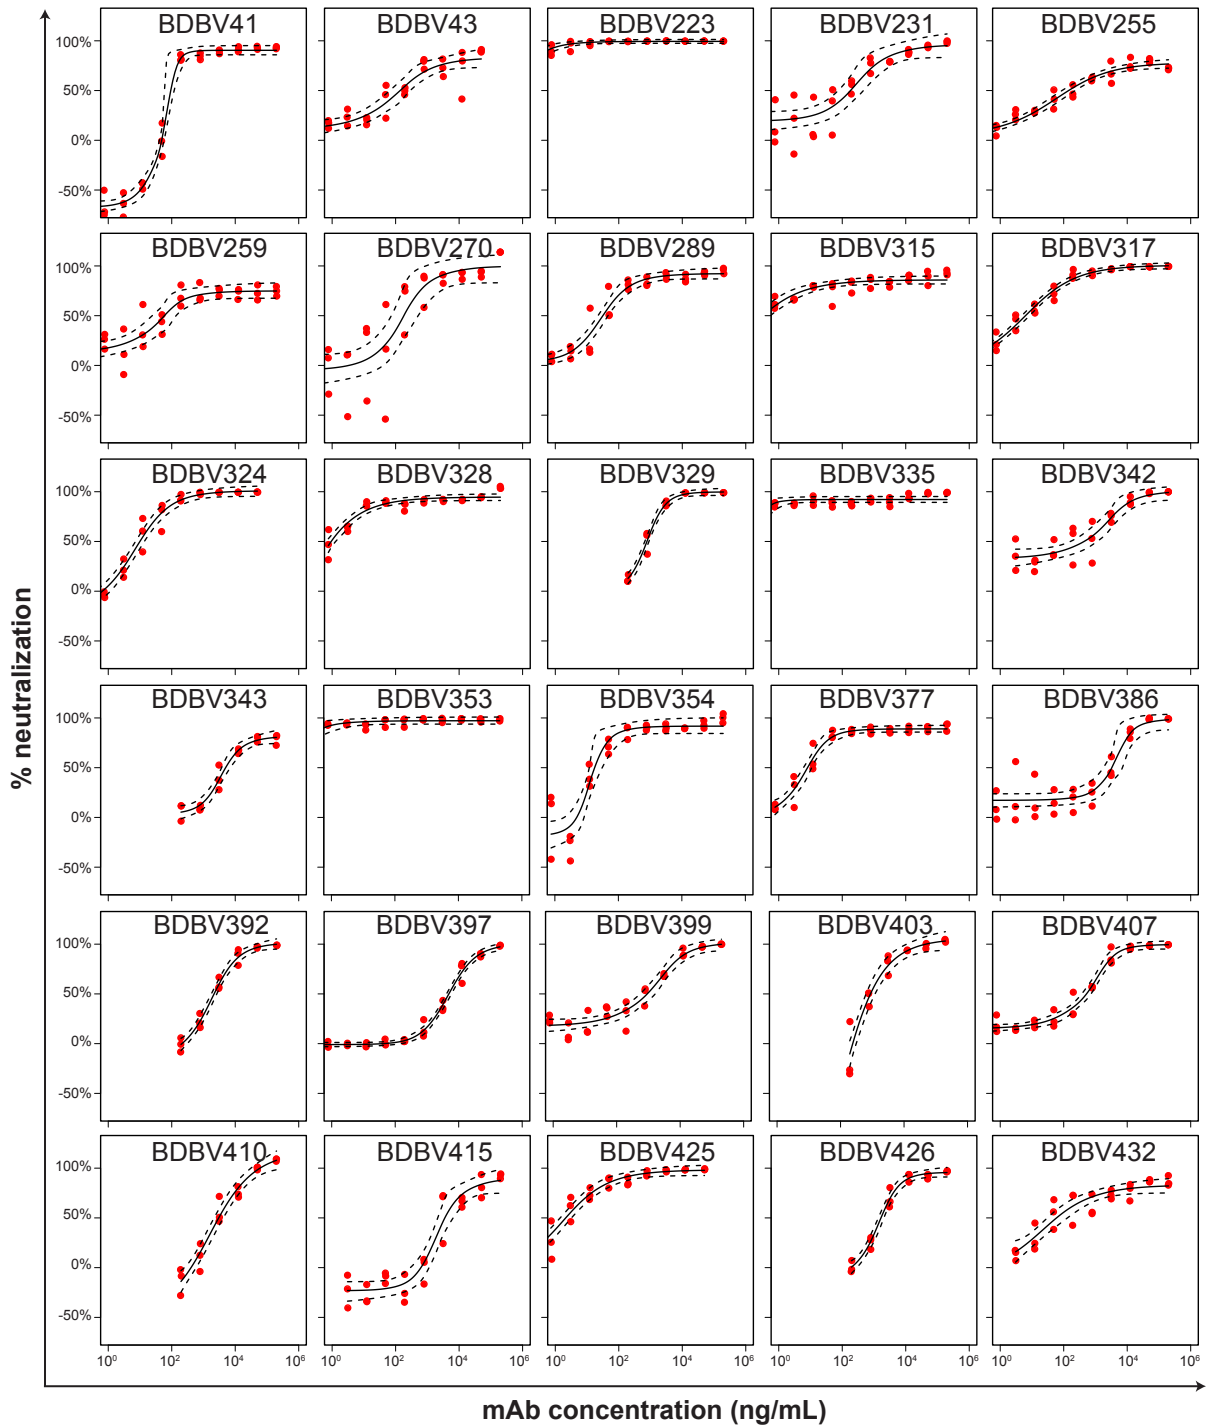

Supplement: NIHMS746048-supplement-2.pdf [file NIHMS746048-supplement-2.pdf]
